# Supplementary material for: Evaluation of Bioinformatic Programmes for the Analysis of Variants within Splice Site Consensus Regions
Source: PubMed Central journal article supplement (PMC4894998; doi:10.1155/2016/5614058), 2016-05-24
Supplement: 5614058.f1.pdf [file 5614058.f1.pdf]

Supplementary Table 1. Pathogenic mutations

| Position | Gene    | Variant                  | HSF | MES | Nnsplice | ASSP |
|----------|---------|--------------------------|-----|-----|----------|------|
| -9       | CFTR    | NM_000492.3: c.1585-9T>C | N   | N   | Y        | N    |
| -9       | ETFDH   | NM_004453.3: c.488-9T>C  | N   | N   | N        | Y    |
| -9       | F9      | NM_000133.3: c.392-9T>G  | Y   | N   | Y        | Y    |
| -9       | HPRT1   | NM_000194.2: c.533-9T>A  | Y   | Y   | Y        | Y    |
| -9       | HPRT1   | NM_000194.2: c.533-9T>G  | Y   | Y   | Y        | Y    |
| -9       | MBTPS2  | NM_015884.3: c.671-9T>G  | Y   | Y   | N        | Y    |
| -9       | MPZ     | NM_000530.6: c.449-9C>T  | N   | N   | N        | N    |
| -9       | NXNL1   | NM_138454.1: c.327-9G>A  | N   | Y   | Y        | N    |
| -9       | PARK2   | NM_004562.2: c.535-9T>A  | Y   | N   | Y        | Y    |
| -9       | PMM2    | NM_000303.2: c.640-9T>G  | Y   | Y   | Y        | Y    |
| -9       | RET     | NM_020975.4: c.3188-9C>T | N   | Y   | N        | N    |
| -9       | USH2A   | NM_206933.2: c.2168-9T>G | Y   | Y   | Y        | Y    |
| -8       | APC     | NM_000038.5: c.1549-8A>C | N   | N   | N        | N    |
| -8       | ABCB11  | NM_003742.2: c.2012-8T>G | Y   | Y   | NA       | NA   |
| -8       | ARSB    | NM_000046.3: c.1143-8T>G | Y   | Y   | NA       | Y    |
| -8       | ATP7B   | NM_000053.3: c.2122-8T>G | Y   | Y   | Y        | Y    |
| -8       | CFTR    | NM_000492.3: c.274-8T>C  | N   | N   | N        | N    |
| -8       | CFTR    | NM_000492.3: c.2658-8C>G | Y   | Y   | Y        | Y    |
| -8       | DGUOK   | NM_080916.2: c.592-8T>G  | Y   | Y   | Y        | Y    |
| -8       | DMD     | NM_004006.2: c.1705-8T>C | N   | Y   | N        | N    |
| -8       | F9      | NM_000133.3: c.392-8T>G  | Y   | Y   | Y        | Y    |
| -8       | FBN1    | NM_000138.4: c.3083-8T>G | Y   | Y   | Y        | Y    |
| -8       | GATA6   | NM_005257.5: c.1429-8T>G | Y   | Y   | NA       | NA   |
| -8       | HBB     | NM_000518.4: c.316-8T>G  | Y   | N   | N        | Y    |
| -8       | LDLR    | NM_000527.4: c.1061-8T>C | N   | N   | N        | N    |
| -8       | LDLR    | NM_000527.4: c.1061-8T>G | Y   | Y   | N        | Y    |
| -8       | MAP3K1  | NM_005921.1: c.634-8T>A  | Y   | Y   | NA       | Y    |
| -8       | NEIL2   | NM_145043.2: c.492-8C>T  | N   | N   | N        | N    |
| -8       | TCIRG1  | NM_006019.3: c.2014-8T>C | N   | N   | Y        | N    |
| -8       | TCIRG1  | NM_006019.3: c.504-8G>A  | N   | N   | NA       | N    |
| -7       | ATP7B   | NM_000053.3: c.2866-7T>C | N   | N   | N        | N    |
| -7       | BRCA2   | NM_000059.3: c.68-7T>A   | Y   | Y   | Y        | Y    |
| -7       | COL4A3  | NM_000091.4: c.3518-7C>G | Y   | Y   | Y        | Y    |
| -7       | CREBBP  | NM_004380.2: c.4281-7C>G | Y   | Y   | Y        | Y    |
| -7       | CYP21A2 | NM_000500.7: c.293-7C>G  | Y   | Y   | Y        | Y    |
| -7       | DMD     | NM_004006.2: c.2804-7G>A | N   | Y   | NA       | N    |
| -7       | F7      | NM_000131.4: c.431-7T>G  | Y   | Y   | Y        | Y    |
| -7       | GALT    | NM_000155.3: c.821-7A>G  | N   | N   | Y        | N    |
| -7       | HBB     | NM_000518.4: c.316-7C>A  | Y   | Y   | N        | Y    |
| -7       | HBB     | NM_000518.4: c.316-7C>G  | Y   | Y   | N        | Y    |
| -7       | KCNH2   | NM_000238.3: c.473-7C>A  | Y   | Y   | N        | Y    |
| -7       | LAMB3   | NM_000228.2: c.299-7C>A  | Y   | Y   | N        | Y    |
| -7       | MEN1    | NM_130799.2: c.655-7C>A  | Y   | Y   | NA       | Y    |
| -7       | MVK     | NM_000431.3: c.769-7T>G  | Y   | N   | N        | Y    |
| -7       | MYH7    | NM_000257.3: c.346-7T>C  | N   | N   | N        | N    |
| -7       | NF2     | NM_000268.3: c.1575-7C>A | Y   | Y   | NA       | Y    |
| -7       | PAH     | NM_000277.1: c.1066-7C>A | Y   | Y   | NA       | Y    |
| -7       | PKD2    | NM_000297.3: c.2359-7T>A | Y   | Y   | Y        | Y    |
| -7       | PTS     | NM_000317.2: c.164-7T>A  | Y   | Y   | N        | Y    |
| -7       | RB1     | NM_000321.2: c.2490-7T>G | Y   | Y   | Y        | Y    |
| -6       | ABCA4   | NM_000350.2: c.2919-6C>A | Y   | Y   | Y        | Y    |
| -6       | ABCB11  | NM_003742.2: c.3214-6C>G | Y   | Y   | Y        | Y    |
| -6       | ABCC6   | NM_001171.5: c.346-6G>A  | N   | N   | Y        | N    |

|    |         |                             |   |   |    |    |
|----|---------|-----------------------------|---|---|----|----|
| -6 | AMN     | NM_030943.3: c.1170-6C>T    | N | N | N  | N  |
| -6 | ATM     | NM_000051.3: c.1066-6T>G    | Y | Y | N  | Y  |
| -6 | BRCA1   | NM_007294.3: c.135-6T>G     | Y | Y | Y  | Y  |
| -6 | CAPN3   | NM_000070.2: c.1355-6G>T    | N | N | NA | N  |
| -6 | CDH1    | NM_004360.3: c.2440-6C>G    | Y | N | N  | Y  |
| -6 | CFTR    | NM_000492.3: c.2620-6T>C    | N | N | N  | N  |
| -6 | CFTR    | NM_000492.3: c.274-6T>C     | N | N | N  | N  |
| -6 | CUL3    | NM_003590.4: c.1207-6T>G    | Y | Y | Y  | Y  |
| -6 | DFNA5   | NM_004403.2: c.991-6C>G     | Y | Y | Y  | Y  |
| -6 | DSPP    | NM_014208.3: c.52-6T>G      | Y | Y | Y  | N  |
| -6 | FANCD2  | NM_033084.3: c.1948-6C>A    | Y | Y | Y  | Y  |
| -6 | FAS     | NM_000043.4: c.506-6C>G     | Y | Y | Y  | Y  |
| -6 | FERMT1  | NM_017671.4: c.1140-6T>A    | Y | Y | Y  | Y  |
| -6 | FGFR1   | NM_023110.2: c.2187-6C>T    | N | N | N  | N  |
| -6 | FKTN    | NM_001079802.1: c.1045-6C>G | Y | Y | N  | Y  |
| -6 | GCK     | NM_000162.3: c.680-6C>A     | Y | Y | Y  | Y  |
| -6 | GHR     | NM_000163.4: c.785-6T>A     | Y | Y | Y  | Y  |
| -5 | ABCC6   | NM_001171.5: c.1868-5T>G    | Y | Y | Y  | Y  |
| -5 | ABCA4   | NM_000350.2: c.769-5T>G     | Y | Y | NA | Y  |
| -5 | ABCC8   | NM_000352.4: c.1672-5C>G    | Y | Y | Y  | Y  |
| -5 | ADAR    | NM_001111.4: c.2886-5T>C    | N | Y | Y  | N  |
| -5 | ATP7B   | NM_000053.3: c.1708-5T>G    | Y | Y | Y  | Y  |
| -5 | ATRX    | NM_000489.4: c.5273-5C>G    | Y | Y | Y  | Y  |
| -5 | BRCA1   | NM_007294.3: c.4987-5T>A    | Y | Y | Y  | Y  |
| -5 | CLCN1   | NM_000083.2: c.1167-5T>G    | Y | Y | Y  | Y  |
| -5 | COL1A1  | NM_000088.3: c.1984-5C>A    | Y | Y | Y  | Y  |
| -5 | DKC1    | NM_001363.4: c.85-5C>G      | Y | Y | NA | Y  |
| -5 | DMD     | NM_004006.2: c.1705-5T>G    | Y | Y | Y  | Y  |
| -5 | DPM1    | NM_003859.1: c.373-5T>A     | Y | Y | NA | Y  |
| -5 | DYNC2H1 | NM_001080463.1: c.2346-5T>G | Y | Y | Y  | Y  |
| -5 | FANCA   | NM_000135.2: c.710-5T>C     | Y | Y | Y  | N  |
| -5 | FAS     | NM_000043.4: c.569-5T>G     | Y | Y | Y  | Y  |
| -5 | FBN2    | NM_001999.3: c.3974-5T>G    | Y | Y | NA | NA |
| -5 | FRMD7   | NM_194277.2: c.206-5T>A     | Y | Y | NA | Y  |
| -5 | GCH1    | NM_000161.2: c.344-5T>G     | Y | Y | NA | Y  |
| -5 | GNAL    | NM_001142339.2: c.274-5T>C  | N | Y | N  | N  |
| -4 | ANTXR2  | NM_058172.5: c.225-4G>A     | N | N | N  | N  |
| -4 | APOB    | NM_000384.2: c.2068-4T>A    | N | N | N  | N  |
| -4 | ATP7A   | NM_000052.6: c.2917-4A>G    | N | N | Y  | N  |
| -4 | CDKN2A  | NM_000077.4: c.151-4G>C     | N | N | N  | N  |
| -4 | CFTR    | NM_000492.3: c.2909-4A>G    | N | N | Y  | N  |
| -4 | CFTR    | NM_000492.3: c.3140-4A>G    | N | N | NA | NA |
| -4 | DHCR7   | NM_001360.2: c.99-4G>A      | N | N | N  | N  |
| -4 | EMX2    | NM_004098.3: c.407-4G>T     | N | Y | N  | N  |
| -4 | F9      | NM_000133.3: c.392-4T>C     | N | N | N  | N  |
| -4 | F9      | NM_000133.3: c.839-4A>G     | N | Y | Y  | N  |
| -4 | GNE     | NM_001128227.2: c.1505-4G>A | N | Y | NA | NA |
| -4 | HNF4A   | NM_175914.4: c.427-4G>A     | N | N | NA | N  |
| -4 | IDUA    | NM_000203.4: c.973-4G>A     | N | N | Y  | N  |
| -4 | LDLR    | NM_000527.4: c.941-4G>A     | N | N | NA | N  |
| -4 | MEFV    | NM_000243.2: c.1760-4G>A    | N | N | N  | N  |
| -4 | NF1     | NM_000267.3: c.2851-4T>G    | N | N | N  | N  |
| -4 | PPT1    | NM_000310.3: c.363-4G>A     | N | N | N  | N  |
| -4 | PROC    | NM_000312.3: c.71-4C>T      | N | N | NA | N  |
| -4 | PROC    | NM_000312.3: c.263-4G>A     | N | N | N  | N  |
| -4 | SLC12A3 | NM_000339.2: c.1568-4G>A    | N | N | NA | NA |

|    |         |                             |   |   |    |    |
|----|---------|-----------------------------|---|---|----|----|
| -3 | ABCB4   | NM_000443.3: c.3280-3C>G    | Y | Y | Y  | Y  |
| -3 | ABCC6   | NM_001171.5: c.3507-3C>A    | Y | Y | N  | Y  |
| -3 | ABCC6   | NM_001171.5: c.3507-3C>T    | Y | N | N  | Y  |
| -3 | ABCC6   | NM_001171.5: c.3634-3C>A    | Y | Y | Y  | Y  |
| -3 | ABCC8   | NM_000352.4: c.3989-3C>G    | Y | N | NA | Y  |
| -3 | ABCD1   | NM_000033.3: c.901-3C>G     | Y | Y | Y  | Y  |
| -3 | ACVRL1  | NM_000020.2: c.314-3C>G     | Y | Y | Y  | Y  |
| -3 | ACVRL1  | NM_000020.2: c.626-3C>G     | Y | Y | Y  | Y  |
| -3 | AGK     | NM_018238.3: c.424-3C>G     | Y | Y | Y  | Y  |
| -3 | ALG8    | NM_024079.4: c.778-3C>A     | Y | Y | Y  | Y  |
| -3 | AMN     | NM_030943.3: c.44-3C>G      | Y | Y | Y  | Y  |
| -3 | ANKS6   | NM_173551.3: c.1973-3C>G    | Y | Y | Y  | Y  |
| -3 | APC     | NM_000038.5: c.1409-3T>G    | Y | Y | Y  | Y  |
| -3 | APC     | NM_000038.5: c.1744-3T>G    | Y | Y | Y  | Y  |
| -3 | APC     | NM_000038.5: c.423-3T>A     | Y | Y | NA | NA |
| -3 | AR      | NM_000044.3: c.1769-3C>G    | Y | Y | Y  | Y  |
| -3 | ARSA    | NM_000487.5: c.1108-3C>G    | Y | Y | Y  | Y  |
| -3 | ATP7B   | NM_000053.3: c.3061-3C>A    | Y | Y | Y  | Y  |
| -3 | ATP8B1  | NM_005603.4: c.2932-3C>A    | Y | Y | Y  | Y  |
| -3 | BBS4    | NM_033028.4: c.157-3C>G     | Y | Y | Y  | Y  |
| 3  | ABCA4   | NM_000350.2: c.66+3A>C      | Y | Y | Y  | Y  |
| 3  | ABCA4   | NM_000350.2: c.5312+3A>T    | Y | Y | Y  | Y  |
| 3  | ABCB11  | NM_003742.2: c.76+3G>T      | Y | Y | Y  | Y  |
| 3  | ABCB11  | NM_003742.2: c.150+3A>C     | Y | Y | Y  | Y  |
| 3  | ACAD8   | NM_014384.2: c.841+3G>C     | Y | Y | Y  | Y  |
| 3  | ALDH5A1 | NM_001080.3: c.1343+3A>T    | Y | Y | Y  | Y  |
| 3  | AMH     | NM_000479.3: c.412+3A>C     | Y | Y | Y  | Y  |
| 3  | ATCAY   | NM_033064.4: c.965+3G>T     | Y | Y | Y  | Y  |
| 3  | BBS1    | NM_024649.4: c.1110+3G>C    | Y | Y | Y  | Y  |
| 3  | BLM     | NM_000057.3: c.3210+3A>T    | Y | Y | Y  | Y  |
| 3  | BLNK    | NM_013314.3: c.47+3A>T      | Y | Y | Y  | Y  |
| 3  | SCN1A   | NM_001165963.1: c.2589+3A>T | Y | Y | N  | Y  |
| 3  | TPM1    | NM_001018005.1: c.240+3A>G  | Y | Y | N  | N  |
| 3  | BMPR2   | NM_001204.6: c.418+3A>T     | Y | Y | Y  | Y  |
| 3  | BRCA1   | NM_007294.3: c.134+3A>C     | Y | Y | Y  | Y  |
| 3  | NIPBL   | NM_133433.3: c.3768+3A>T    | Y | Y | Y  | Y  |
| 3  | NIPBL   | NM_133433.3: c.5225+3A>C    | N | Y | Y  | Y  |
| 3  | LAMA2   | NM_000426.3: c.112+3A>G     | N | Y | Y  | Y  |
| 3  | VHL     | NM_000551.3: c.463+3A>G     | Y | Y | Y  | Y  |
| 3  | VHL     | NM_000551.3: c.463+3A>T     | Y | Y | Y  | Y  |
| 4  | ABCB11  | NM_003742.2: c.3213+4A>G    | Y | Y | Y  | Y  |
| 4  | ABCC2   | NM_000392.4: c.1031+4A>G    | Y | Y | Y  | Y  |
| 4  | ALG8    | NM_024079.4: c.673+4A>G     | Y | Y | NA | NA |
| 4  | AMN     | NM_030943.3: c.43+4A>G      | Y | Y | Y  | Y  |
| 4  | APOB    | NM_000384.2: c.904+4A>G     | Y | Y | Y  | Y  |
| 4  | BBS1    | NM_024649.4: c.1473+4A>G    | Y | Y | Y  | Y  |
| 4  | BEST1   | NM_004183.3: c.867+4G>A     | N | N | NA | N  |
| 4  | SLC12A3 | NM_000339.2: c.1095+4A>G    | Y | Y | Y  | Y  |
| 4  | G6PC    | NM_000151.3: c.230+4A>G     | Y | Y | Y  | Y  |
| 4  | GAA     | NM_000152.3: c.2331+4A>G    | Y | Y | Y  | Y  |
| 4  | RET     | NM_020975.4: c.1879+4A>G    | Y | Y | Y  | Y  |
| 4  | HADHB   | NM_000183.2: c.209+4A>T     | Y | Y | Y  | Y  |
| 4  | HNF1A   | NM_000545.5: c.526+4A>G     | Y | Y | Y  | Y  |
| 4  | HPRT1   | NM_000194.2: c.609+4A>G     | Y | Y | Y  | Y  |
| 4  | MAPT    | NM_005910.5: c.915+4A>C     | Y | Y | Y  | Y  |
| 4  | KIT     | NM_000222.2: c.67+4G>A      | N | N | N  | N  |

|   |         |                             |   |   |    |    |
|---|---------|-----------------------------|---|---|----|----|
| 4 | PAX6    | NM_000280.4: c.1183+4A>G    | Y | Y | Y  | Y  |
| 4 | MLH1    | NM_000249.3: c.790+4A>T     | Y | Y | Y  | Y  |
| 4 | MAPT    | NM_005910.5: c.915+4A>C     | Y | Y | Y  | Y  |
| 4 | OTC     | NM_000531.5: c.77+4A>C      | Y | Y | N  | Y  |
| 5 | ABCC8   | NM_000352.4: c.1923+5G>T    | Y | Y | Y  | Y  |
| 5 | APC     | NM_000038.5: c.531+5G>C     | Y | Y | Y  | Y  |
| 5 | AR      | NM_000044.3: c.1616+5G>C    | Y | Y | Y  | Y  |
| 5 | AR      | NM_000044.3: c.2449+5G>T    | Y | Y | Y  | Y  |
| 5 | ANK1    | NM_000037.3: c.27+5G>C      | Y | Y | Y  | Y  |
| 5 | ASPM    | NM_018136.4: c.2936+5G>T    | Y | Y | NA | N  |
| 5 | SCN1A   | NM_001165963.1: c.3705+5G>C | Y | Y | Y  | Y  |
| 5 | VHL     | NM_000551.3: c.340+5G>C     | Y | N | Y  | N  |
| 5 | RS1     | NM_000330.3: c.52+5G>C      | Y | Y | Y  | Y  |
| 5 | SLC12A3 | NM_000339.2: c.2368+5G>T    | Y | Y | Y  | Y  |
| 5 | SLC2A2  | NM_000340.1: c.775+5G>C     | Y | Y | Y  | Y  |
| 5 | NF1     | NM_000267.3: c.204+5G>C     | Y | Y | Y  | Y  |
| 5 | NF1     | NM_000267.3: c.586+5G>A     | Y | Y | Y  | Y  |
| 5 | GCH1    | NM_000161.2: c.343+5G>C     | Y | Y | Y  | Y  |
| 5 | GCH1    | NM_000161.2: c.509+5G>A     | Y | Y | N  | Y  |
| 5 | GCH1    | NM_000161.2: c.626+5G>A     | Y | Y | Y  | Y  |
| 5 | RET     | NM_020975.4: c.1879+5G>C    | Y | Y | Y  | Y  |
| 5 | RET     | NM_020975.4: c.2607+5G>A    | Y | Y | Y  | Y  |
| 5 | RET     | NM_020975.4: c.2939+5G>A    | Y | Y | NA | Y  |
| 5 | SDHD    | NM_003002.3: c.169+5G>A     | Y | Y | NA | Y  |
| 6 | ABCA4   | NM_000350.2: c.5584+6T>C    | Y | Y | NA | Y  |
| 6 | ABCC8   | NM_000352.4: c.3329+6C>T    | N | N | N  | N  |
| 6 | ACADM   | NM_000016.5: c.708+6G>T     | N | N | N  | N  |
| 6 | ADA     | NM_000022.2: c.478+6T>A     | Y | Y | Y  | Y  |
| 6 | ATP7A   | NM_000052.6: c.1946+6T>C    | Y | Y | Y  | Y  |
| 6 | ATP7A   | NM_000052.6: c.2172+6T>G    | Y | N | NA | NA |
| 6 | ATP7A   | NM_000052.6: c.4226+6T>C    | Y | Y | Y  | Y  |
| 6 | BMPR2   | NM_001204.6: c.247+6T>G     | Y | Y | NA | NA |
| 6 | BRCA1   | NM_007294.3: c.4357+6T>C    | Y | N | Y  | N  |
| 6 | BTK     | NM_000061.2: c.974+6T>G     | Y | Y | N  | Y  |
| 6 | CAPN3   | NM_000070.2: c.1193+6T>A    | Y | Y | N  | Y  |
| 6 | CFH     | NM_000186.3: c.350+6T>G     | Y | Y | Y  | Y  |
| 6 | COL3A1  | NM_000090.3: c.582+6T>C     | Y | Y | Y  | Y  |
| 6 | COL3A1  | NM_000090.3: c.951+6T>C     | Y | Y | Y  | Y  |
| 6 | PAH     | NM_000277.1: c.1315+6T>A    | Y | Y | Y  | Y  |
| 6 | PTCH1   | NM_000264.3: c.1347+6G>A    | N | Y | N  | N  |
| 6 | RB1     | NM_000321.2: c.1695+6T>C    | Y | Y | Y  | Y  |
| 6 | LAMA2   | NM_000426.3: c.9211+6T>C    | Y | Y | N  | N  |
| 6 | GH1     | NM_000515.4: c.291+6T>C     | Y | Y | Y  | Y  |
| 6 | GH1     | NM_000515.4: c.291+6T>G     | Y | Y | Y  | Y  |
| 7 | ABCC8   | NM_000352.4: c.3867+7G>A    | N | N | N  | N  |
| 7 | BRCA1   | NM_007294.3: c.547+7G>A     | N | N | N  | N  |
| 7 | CFTR    | NM_000492.3: c.3367+7T>G    | N | N | N  | N  |
| 7 | CHD7    | NM_017780.3: c.6103+7A>G    | N | N | N  | N  |
| 7 | FOXP3   | NM_014009.3: c.816+7G>C     | N | N | N  | N  |
| 7 | NCSTN   | NM_015331.2: c.996+7G>A     | N | N | N  | N  |
| 7 | NPHS1   | NM_004646.3: c.1170+7C>T    | N | N | N  | N  |
| 7 | PAH     | NM_000277.1: c.1065+7C>A    | N | N | N  | N  |
| 7 | PROS1   | NM_000313.3: c.76+7A>G      | N | N | N  | N  |
| 7 | PTEN    | NM_000314.5: c.801+7A>G     | N | N | Y  | N  |
| 7 | SCN1A   | NM_001165963.1: c.2589+7A>G | N | N | N  | N  |
| 7 | VHL     | NM_000551.3: c.340+7G>A     | N | N | N  | N  |

|   |      |                         |   |   |   |   |
|---|------|-------------------------|---|---|---|---|
| 7 | SDHB | NM_003000.2: c.200+7A>G | N | N | Y | N |
|---|------|-------------------------|---|---|---|---|

N - predicted to not affect splicing using the cut-off value

Y - predicted to affect splicing using the cut-off value

NA - WT site not detected therefore analysis not available

Supplementary Table 2. Polymorphisms

| Position | Gene           | Variant                          | dbSNP             | HSF      | MES      | Nnsplice | ASSP     |
|----------|----------------|----------------------------------|-------------------|----------|----------|----------|----------|
| -9       | KRAS           | NM_004985.4:c.451-9G>A           | rs12313763        | N        | N        | N        | N        |
| -9       | MSH2           | NM_000251.2:c.1511-9A>T          | rs12998837        | N        | N        | N        | N        |
| -9       | CRBN           | NM_016302.3:c.175-9T>C           | rs1669321         | N        | N        | Y        | N        |
| -9       | FBN1           | NM_000138.4:c.2855-9C>T          | rs140590          | N        | N        | N        | N        |
| -8       | CREBBP         | NM_004380.2:c.3837-8C>T          | rs3025684         | N        | N        | N        | N        |
| -8       | RYR2           | NM_001035.2:c.849-8T>C           | rs16835237        | N        | N        | N        | N        |
| -8       | ACTN2          | NM_001103.3:c.877-8C>G           | rs2288601         | Y        | Y        | N        | N        |
| -8       | FBN1           | NM_000138.4:c.3965-8T>C          | rs140637          | N        | N        | N        | N        |
| -8       | RELN           | NM_005045.3:c.4589-8T>G          | rs362801          | Y        | N        | Y        | Y        |
| -8       | USH2A          | NM_007123.5:c.3812-8T>G          | rs646094          | Y        | N        | Y        | Y        |
| -8       | BRCA1          | NM_007294.3:c.4485-8C>T          | rs397507234       | N        | N        | N        | N        |
| -8       | RYR2           | NM_001035.2:c.464-8A>C           | rs10925391        | N        | N        | N        | N        |
| -7       | PCSK9          | NM_174936.3:c.658-7C>T           | rs2483205         | N        | N        | N        | N        |
| -7       | E1F2B4         | NM_015636.3:c.76-7G>A            | rs7602534         | N        | N        | N        | N        |
| -7       | MYO7A          | NM_000260.3:c.5857-7A>T          | rs1320703         | N        | N        | N        | N        |
| -7       | SEC23B         | NM_006363.4:c.1405-7C>T          | rs2273525         | N        | N        | N        | N        |
| -6       | RYR2           | NM_001035.2:c.13783-6A>G         | rs790901          | N        | N        | N        | N        |
| -6       | ALD            | NM_000033.3:c.1489-6delC         | rs398123101       | Y        | N        | N        | Y        |
| -6       | SCN5A          | NM_000335.4:c.2788-6C>T          | rs41260344        | N        | N        | Y        | N        |
| -6       | NKH            | NM_000170.2:c.2316-6_2316-5insA  | rs3215923         | N        | Y        | N        | N        |
| -6       | NDRG1          | NM_001135242.1:c.64-6T>C         | rs2272653         | N        | N        | N        | N        |
| -5       | MYH9           | NM_002473.4:c.2038-5T>C          | rs8137674         | N        | N        | N        | N        |
| -5       | ACTA1          | NM_001100.3:c.130-5T>C           | rs11803533        | N        | N        | Y        | N        |
| -5       | OTOA           | NM_144672.3:c.1630-5C>T          | rs215901          | N        | N        | N        | N        |
| -5       | MYO7A          | NM_000260.3:c.593-5C>T           | rs762666          | N        | N        | N        | N        |
| -5       | INVS           | NM_014425.3:c.1235-5T>C          | rs2245216         | N        | Y        | Y        | N        |
| -5       | MLYCD          | NM_012213.2:c.642-5C>T           | rs2278037         | N        | N        | N        | N        |
| -5       | EPCAM          | NM_002354.2:c.492-5T>C           | rs78608315        | N        | N        | Y        | Y        |
| -5       | NDRG1          | NM_006096.3:c.756-5C>T           | rs2227262         | N        | N        | N        | N        |
| -3       | ATP13A2        | NM_022089.2:c.3084-3C>T          | rs7531163         | Y        | N        | N        | Y        |
| -3       | ABCA4          | NM_000350.2:c.6730-3T>C          | rs1800717         | N        | N        | N        | N        |
| -3       | SCN2A          | NM_021007.2:c.1035-3T>C          | rs2121371         | N        | N        | N        | N        |
| -3       | LQT3           | NM_000335.4:c.1141-3C>A          | rs41312433        | N        | N        | N        | N        |
| <b>3</b> | <b>ARFGEF2</b> | <b>NM_006420.2:c.423+3A&gt;G</b> | <b>rs2295029</b>  | <b>Y</b> | <b>Y</b> | <b>Y</b> | <b>Y</b> |
|          |                | NM_001307975.1:c.959+3_959+4insT |                   |          |          |          |          |
| 3        | TMPO           | nsT                              | rs34449077        | N        | N        | N        | N        |
| <b>3</b> | <b>PCDH15</b>  | <b>NM_033056.3:c.157+3A&gt;G</b> | <b>rs41274636</b> | <b>Y</b> | <b>Y</b> | <b>Y</b> | <b>Y</b> |
| 3        | USH2A          | NM_206933.2:c.15297+3A>G         | rs57754754        | N        | Y        | Y        | N        |
| 4        | OPA1           | NM_130831.2:c.762+4T>C           | rs166850          | N        | N        | N        | Y        |
| 4        | CRYAB          | NM_001289807.1:c.324+4T>G        | rs11603779        | N        | N        | N        | N        |
| 4        | HADHB          | NM_000183.2:c.1149+4A>T          | rs2303893         | Y        | Y        | N        | Y        |
| <b>4</b> | <b>CBL</b>     | <b>NM_005188.3:c.869+4A&gt;G</b> | <b>rs77284821</b> | <b>Y</b> | <b>Y</b> | <b>Y</b> | <b>Y</b> |
|          |                | NM_004999.3:c.1546+4_1546+5del   |                   |          |          |          |          |
| 4        | MYO6           | I                                | rs138200430       | N        | N        | N        | N        |
| 4        | HFE            | NM_001010980.4:c.-7-13380T>C     | rs7515611         | N        | N        | N        | N        |
| 5        | GALC           | NM_000153.3:c.1834+5C>G          | rs448805          | N        | N        | N        | N        |
| 5        | NEBL           | NM_006393.2:c.1008+5A>G          | rs703089          | N        | N        | N        | N        |
| 5        | GNPTAB         | NM_024312.4:c.3135+5T>C          | rs759935          | N        | N        | N        | Y        |
| 5        | SYNE2          | NM_182913.2:c.235+5C>T           | rs1152590         | N        | N        | N        | Y        |
| 6        | CHRNB1         | NM_000747.2:c.610+6T>C           | rs2302765         | Y        | Y        | N        | Y        |
| 6        | FLCN           | NM_144997.5:c.1062+6C>T          | rs8065832         | N        | N        | N        | N        |
| 6        | ATP7B          | NM_000053.3:c.3903+6C>T          | rs2282057         | N        | N        | N        | N        |

**Bold: indicate polymorphisms which had %score change above cut-off for all four programmes.**

N - predicted to not affect splicing using the cut-off value

Y - predicted to affect splicing using the cut-off value

NA - WT site not detected therefore analysis not available
